# Supplementary material for: A luminescent neutral cadmium(ii)–boron(iii)–imidazolate framework with sql net
Source: Royal Society of Chemistry journal article supplement (doi:10.1039/c3ce42604a), 2014-01-01
Supplement: c3ce42604a.pdf [file c3ce42604a.pdf]

## Electronic Supplementary Information

### **A luminescent neutral cadmium(II)-boron(III)-imidazolate framework with *sql* net**

E Yang<sup>a,b</sup>, Lin Wang<sup>a,b</sup> and Jian Zhang<sup>a,\*</sup>

<sup>a</sup> State Key Laboratory of Structural Chemistry, Fujian Institute of Research on the Structure of Matter, the Chinese Academy of Sciences, Fuzhou, Fujian 350002, P. R. China.

<sup>b</sup> College of Chemistry and Chemistry Engineering, Fujian Normal University, Fujian, Fuzhou, 350007, P. R. China.

\* Corresponding Author  
E-mail: [zhj@fjirsm.ac.cn](mailto:zhj@fjirsm.ac.cn)

**Synthesis of [CdBrB(im)<sub>4</sub>] (BIF-35):** the mixture of cadmium acetate dihydrate (0.0672g), KB(im)<sub>4</sub> (0.0722g), tetramethylammonium bromide (0.0752g), piperazine (0.0242g), ethyleneurea (0.1812g), dimethylformamide (2.5ml) and distilled water (0.5 ml) was sealed in 20 mL vial and kept at 100 °C for 4 days. After cooling to room-temperature, the colourless crystals were obtained in pure phase (Yield: 30%). Anal. Calcd for **BIF-35**, C<sub>12</sub>H<sub>12</sub>N<sub>8</sub>BBrCd (471.42): C, 30.57; H, 2.56; N, 23.76. Found: C, 31.02; H, 2.78; N, 24.14.

#### Powder X-ray Diffraction Studies

The Powder X-ray diffraction (PXRD) patterns were collected on a MiniFlex-II diffractometer with Cu K $\alpha$  radiation ( $\lambda = 1.54056 \text{ \AA}$ ) with a step size of 0.05°. The 2-theta angular range is from 8 to 50 degrees.

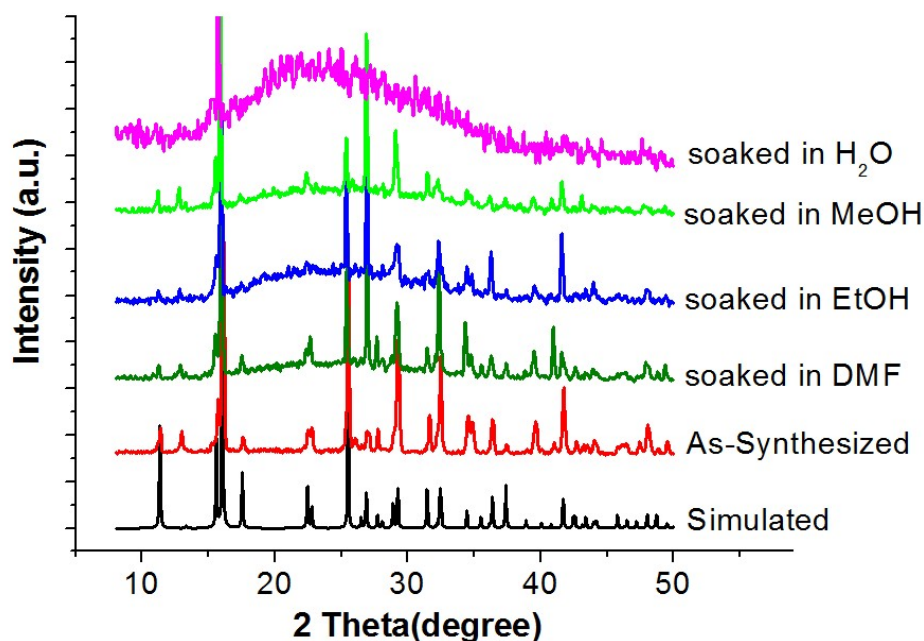

**Fig. S1** The Powder XRD patterns of **BIF-35** and the samples soaked in DMF, EtOH, MeOH, H<sub>2</sub>O for 30 min, respectively.

#### Thermogravimetric Analysis of BIF-35

Thermogravimetric (TG) analysis was carried out on a NETSCHZ STA-449C thermoanalyzer with a heating rate of 10 °C/min under nitrogen gas atmosphere. The temperature range is 25 to 600 °C

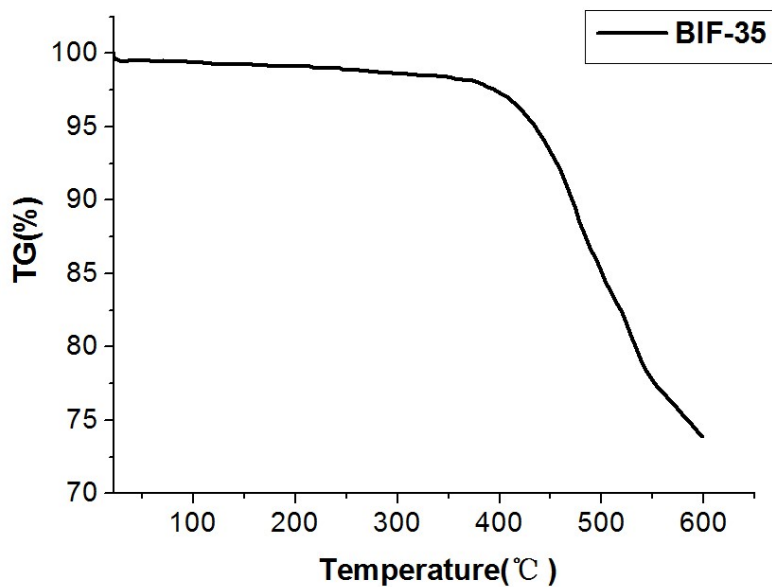

**Fig. S2** The TGA diagram of **BIF-35**.

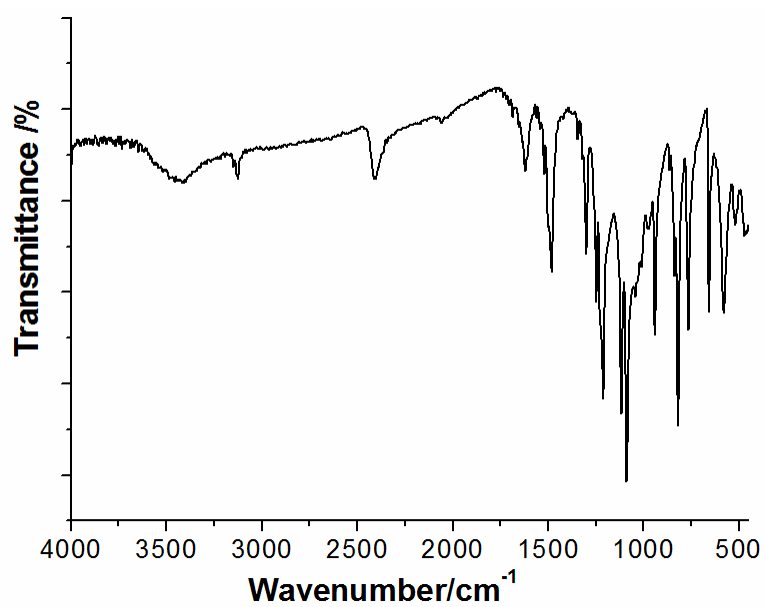

**Fig. S3** The FT-IR (KBr) spectrum of as-synthesized **BIF-35** at room temperature. IR (KBr, cm<sup>-1</sup>): 3412(w), 3134(w), 2406(w), 1613(w), 1482(m), 1209(s), 1085(s), 938(m), 818(s), 764(m), 654(m), 576(m).
